# Supplementary material for: Lack of T Cell Response to iPSC-Derived Retinal Pigment Epithelial Cells from HLA Homozygous Donors
Source: PubMed Central journal article supplement — Stem Cell Reports. 2016 Sep 15;7(4):619–34. doi: 10.1016/j.stemcr.2016.08.011 (PMC5063628; doi:10.1016/j.stemcr.2016.08.011), 2016-09-15
Supplement: mmc1.pdf [file mmc1.pdf]

**Stem Cell Reports, Volume 7**

**Supplemental Information**

**Lack of T Cell Response to iPSC-Derived Retinal Pigment Epithelial  
Cells from HLA Homozygous Donors**

**Sunao Sugita, Yuko Iwasaki, Kenichi Makabe, Takafumi Kimura, Takaomi  
Futagami, Shinji Suegami, and Masayo Takahashi**

Supplementary Figure 1.

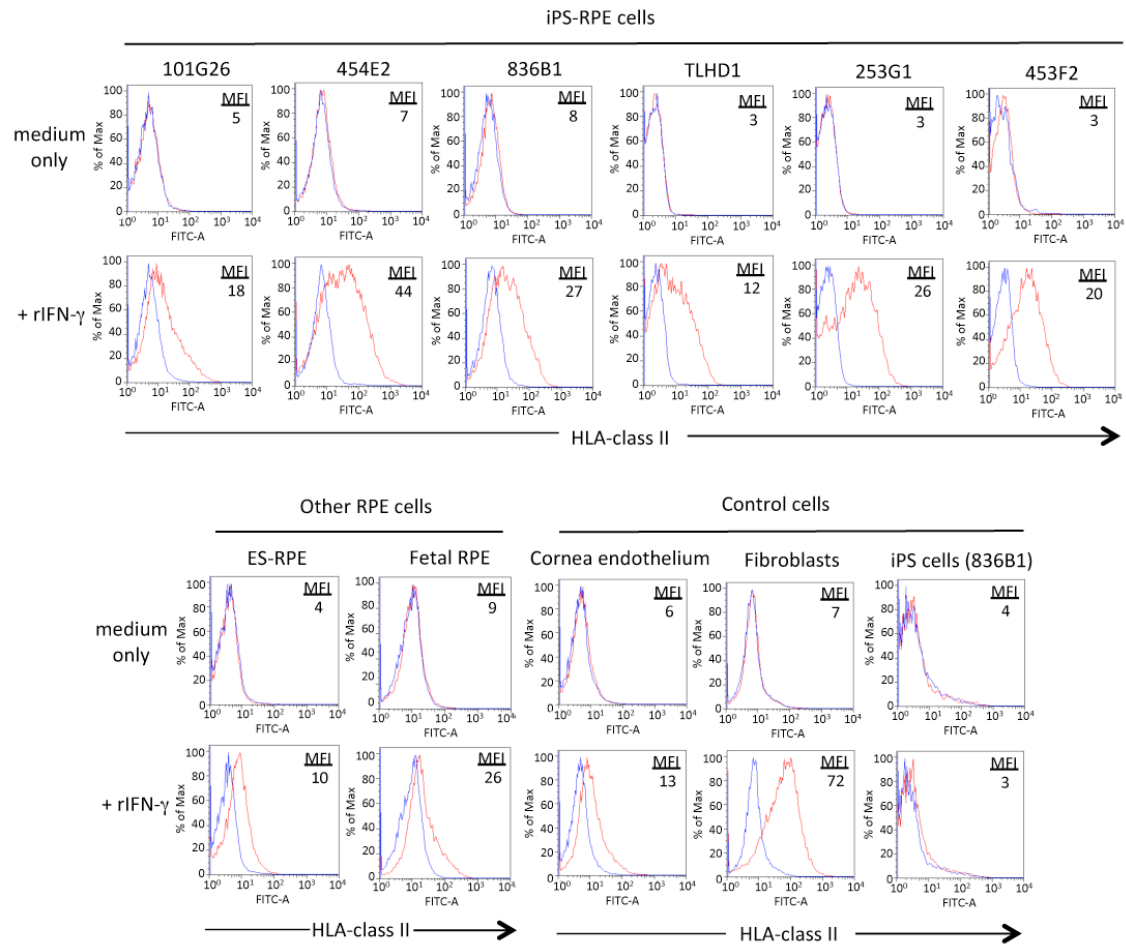

**Expression of HLA-class II on IFN-γ-treated iPS-RPE cells.** iPS-RPE cells (n=6) were cultured for 48 hr in the presence or absence (medium only) of recombinant IFN-γ and stained with anti-HLA-class II antibody. As controls, other human RPE cells (ES cell-derived RPE cells and fetal RPE cells) and control human cells (cornea endothelial cells, fibroblasts, and iPS cells) were also prepared. MFI - mean fluorescence intensity.

Supplementary Figure 2.

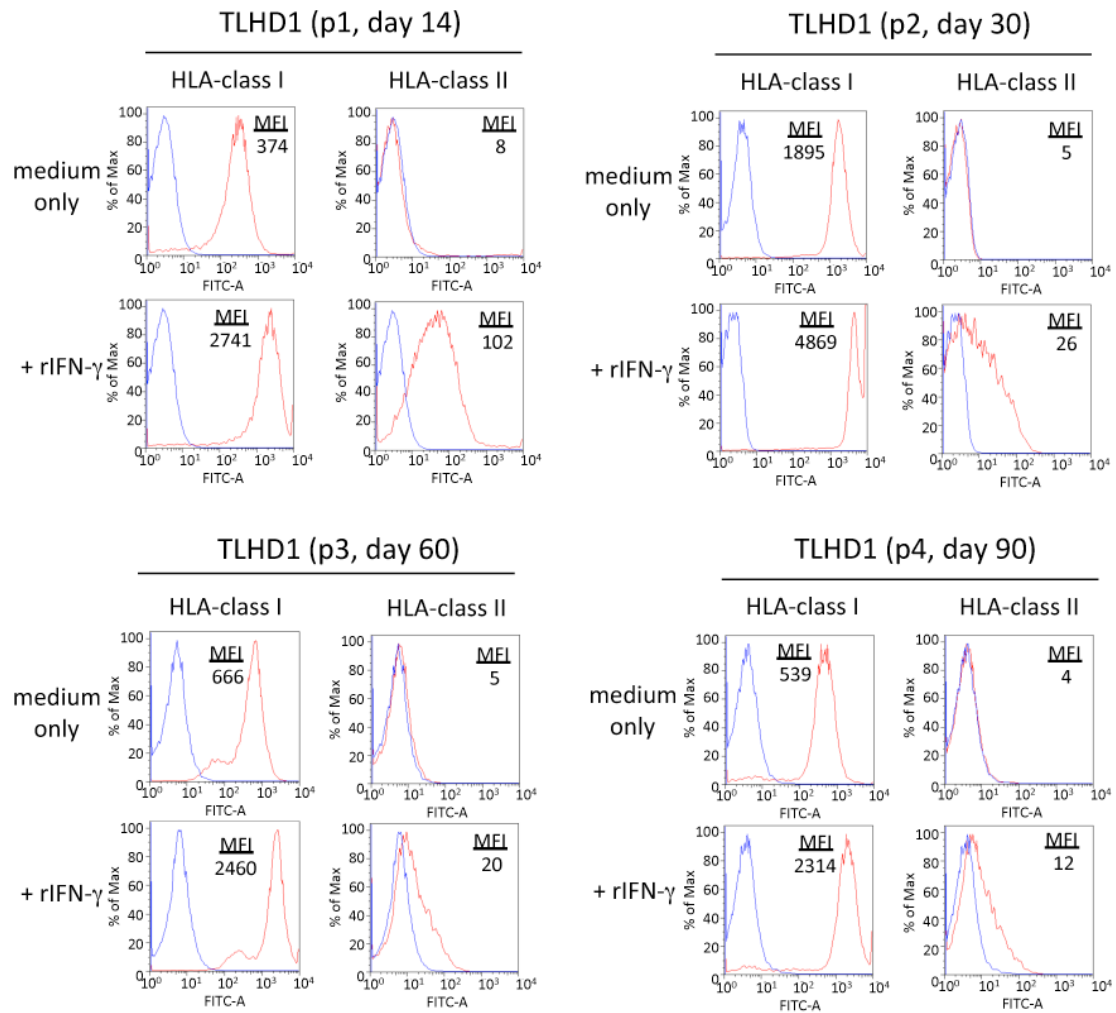

**Expression of HLA-class I and class II on human iPS cell-derived RPE cells at different culture stages.** TLHD1 iPS-RPE cells were prepared from passage 1 (p1), p2, p3, or p4 and stained with anti-HLA-class I or -class II antibody. Cells were cultured with recombinant IFN- $\gamma$  for 48 hr. Other human iPS-RPE cells, 454E2 RPE cells, yielded similar results (data not shown). MFI - mean fluorescence intensity.

## Supplementary Figure 3.

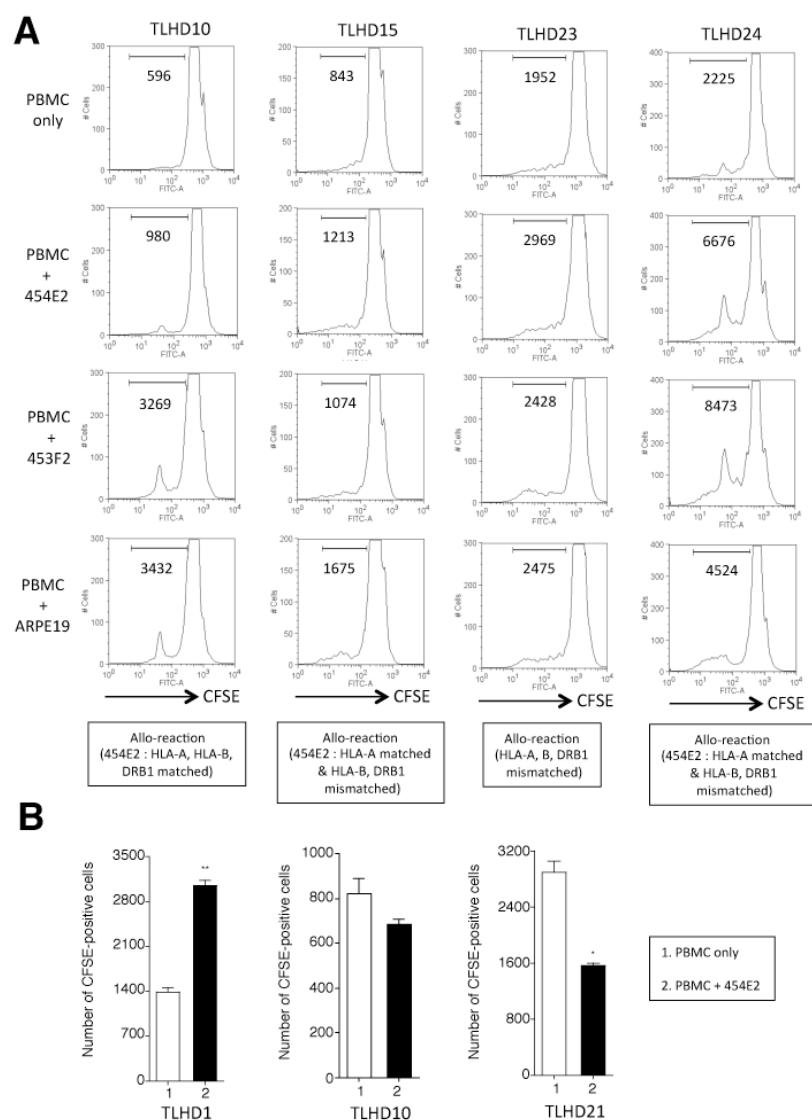

**Results of PBMC-RPE MLR assay.** (A) MHC homozygote iPS-RPE cells (target cells; 454E2, 453F2), ARPE-19 RPE cell lines, and B cells (data not shown) were cultured with CFSE-labeled PBMC (effector cells) from TLHD10, 15, 23, or 24 donors for 96-120 hr (effector: target ratio = 100:1). The only HLA-matched combination was TLHD10 PBMC and 454E2 iPS-RPE cells; no other combinations were HLA matched. Numbers in the histogram indicate CFSE-positive cells. (B) We statistically analyzed these MLR data between TLHD1, TLHD10, and TLHD21 donors and 454E2 iPS-RPE cells. The mean and standard deviation of the number of CFSE-positive cells are shown. Data represent the means  $\pm$  S.E.M of three independent experiments. \*  $P < 0.05$ , \*\*  $P < 0.005$ , as compared to PBMC only (open bar).

Supplementary Figure 4.

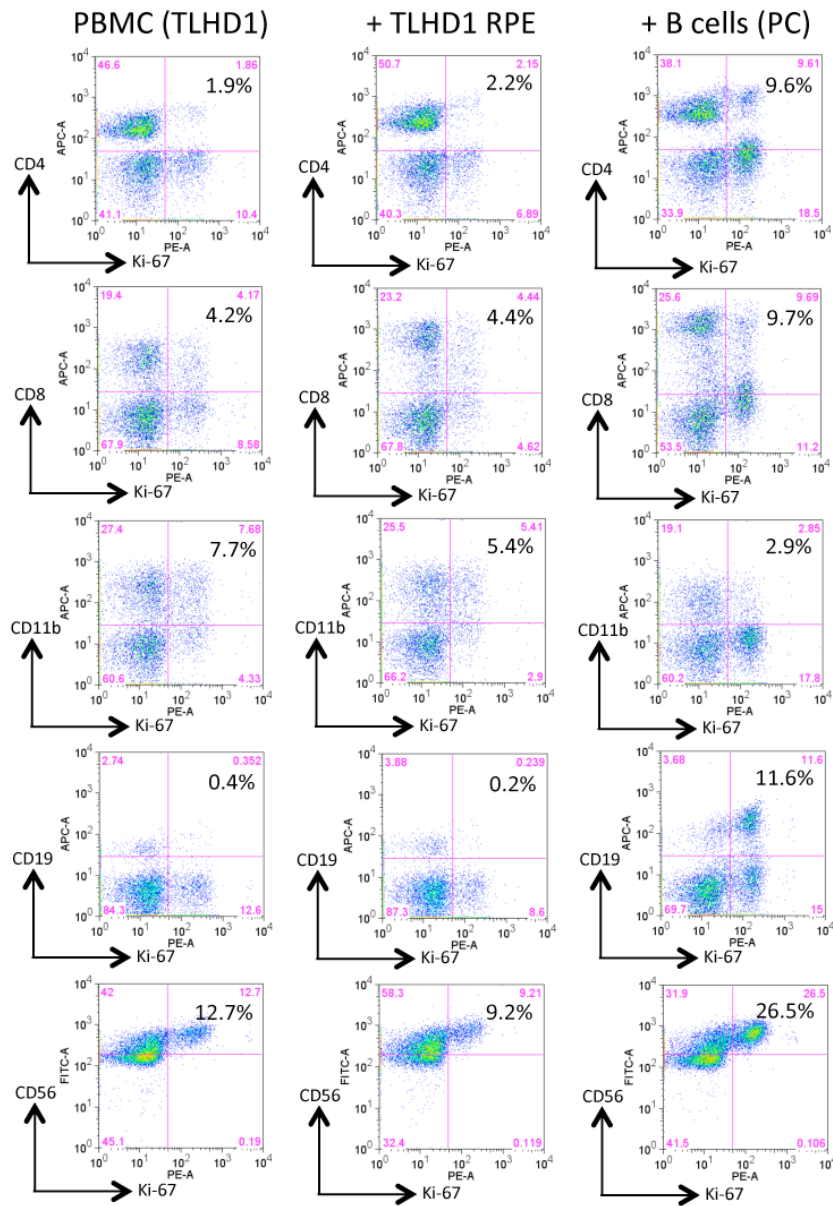

**PBMC-RPE MLR assay (Ki-67 proliferation) with autogenic iPS cell-RPE cells.** To evaluate another PBMC-RPE MLR assay with allogeneic HLA homozygote iPS-RPE cells (454E2, 453F2, and Ff-I01) and B cells as positive control cells, we first used autogenic iPS cell-RPE cells (TLHD1 PBMC and TLHD1 iPS-RPE cells), and we stained harvested PBMC after co-cultures: CD4<sup>+</sup> cells (helper T cells), CD8<sup>+</sup> cells (cytotoxic T cells), CD11b<sup>+</sup> cells (macrophages/monocytes), CD19<sup>+</sup> cells (B cells), and CD56<sup>+</sup> (NK cells). As expected, TLHD1 PBMC did not respond to auto-RPE cells in vitro, whereas all types of immune cells in PBMC (except CD11b) greatly responded to allogeneic B cells (PC).

Supplementary Figure 5.

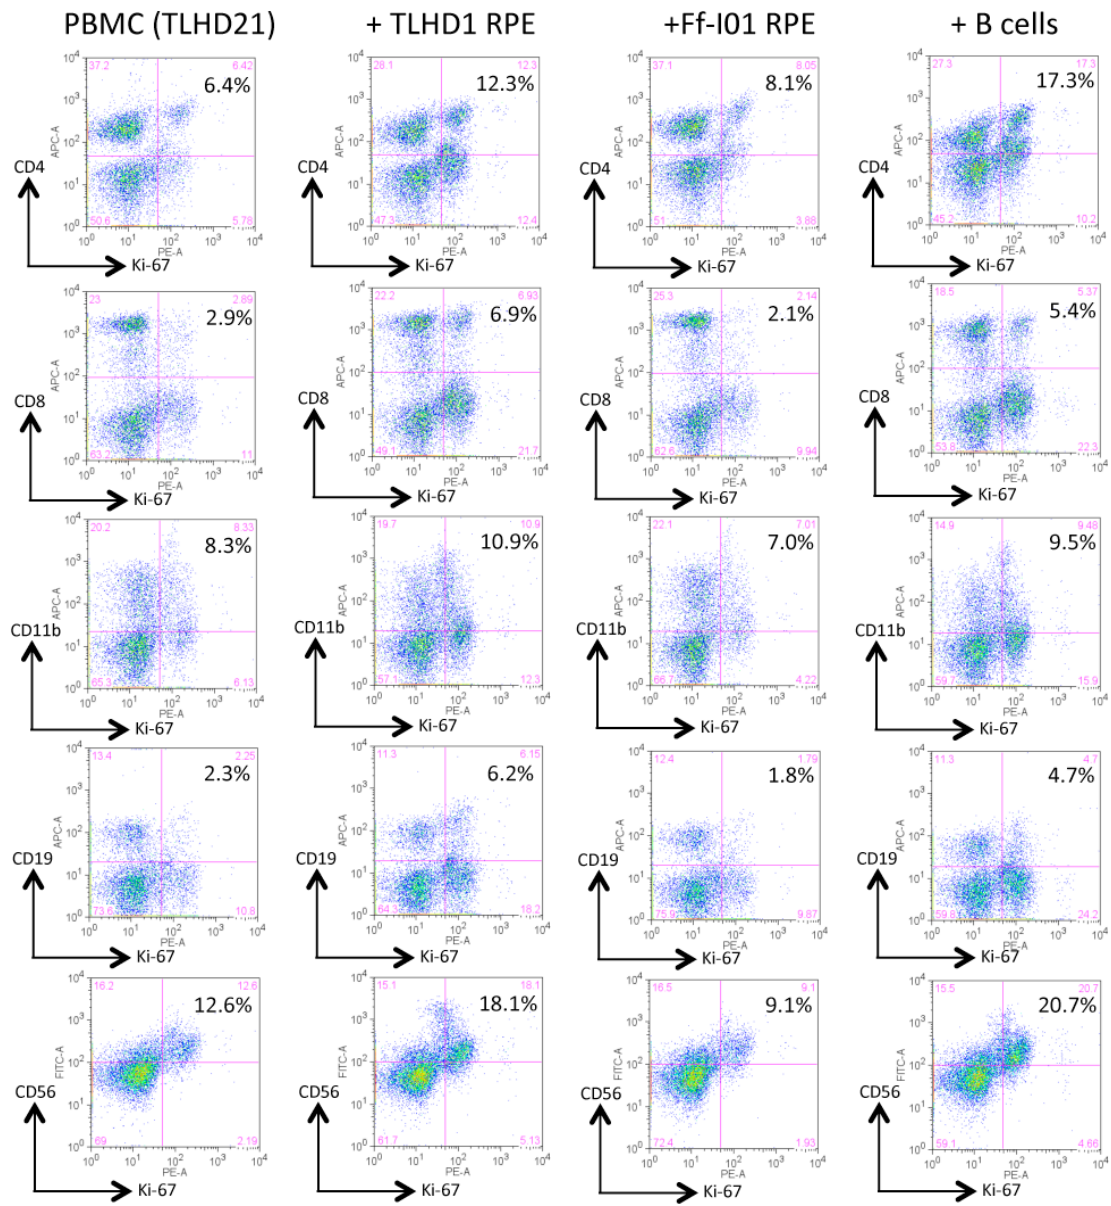

**PBMC-RPE MLR assay by Ki-67 proliferation.** TLHD21 PBMC versus TLHD1 iPS-RPE cells = HLA-A, B, DRB1 all mismatched, and TLHD21 PBMC versus Ff-I01 iPS-RPE cells = HLA-A, B, DRB1 all matched.

Supplementary Figure 6.

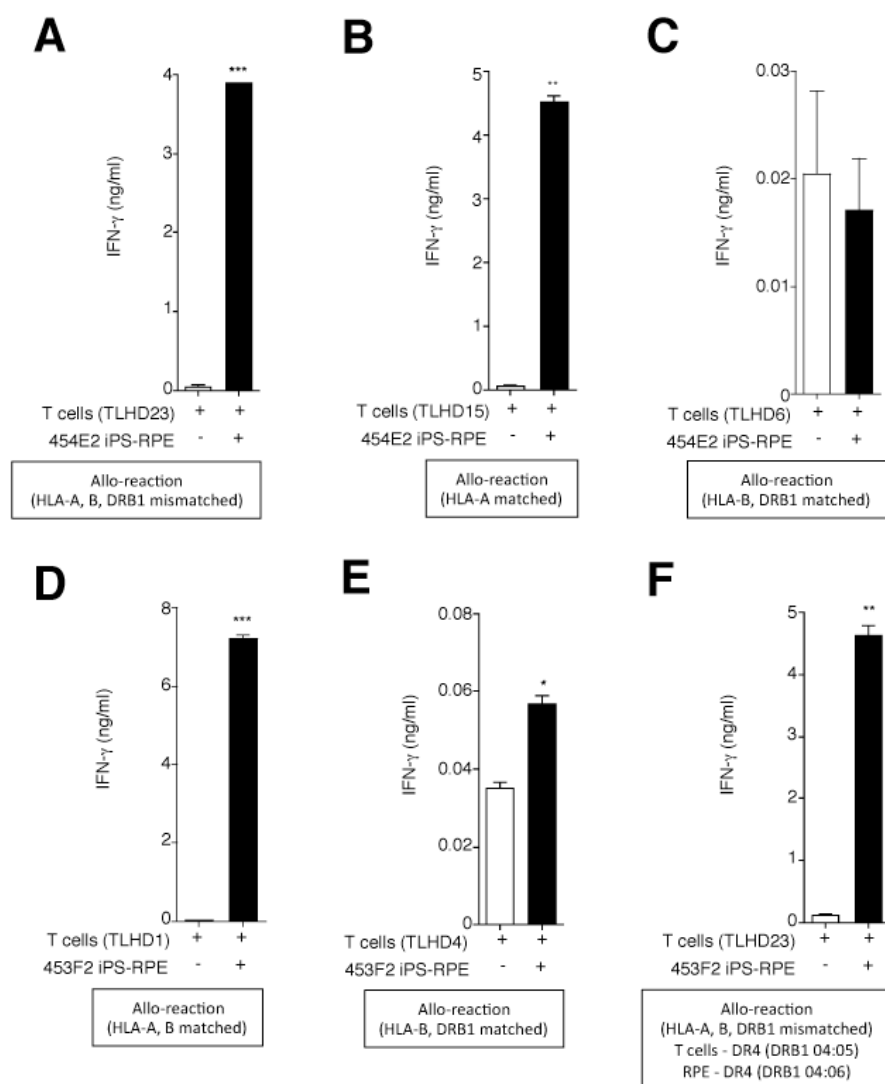

**Recognition of HLA-A, B, DRB1 on allogeneic iPS-RPE cells from HLA homozygous donors by CD4<sup>+</sup> T cells obtained from MHC-matched donors.** The graph indicates ELISA data for IFN- $\gamma$  production by CD4<sup>+</sup> T cells exposed to 454E2 or 453F2 iPS-RPE cells. (A) TLHD23 T cells vs 454E2 RPE cells (HLA-A, B, and DRB1 mismatched), (B) TLHD15 T cells vs 454E2 RPE cells (HLA-A matched, HLA-B and DRB1 mismatched), (C) TLHD6 T cells vs 454E2 RPE cells (HLA-B and DRB1 matched, HLA-A mismatched), (D) TLHD1 T cells vs 453F2 RPE cells (HLA-A and B matched, HLA-DRB1 mismatched), (E) TLHD4 T cells vs 453F2 RPE cells (HLA-B and DRB1 matched, HLA-A mismatched), (F) TLHD23 T cells vs 453F2 RPE cells (HLA-DR serotype matched, but HLA-DRB1 genotype mismatched). Data represent the means  $\pm$  S.E.M of three independent experiments. \*  $P < 0.05$ , \*\*  $P < 0.005$ , \*\*\*  $P < 0.0005$ , as compared to the control (open bar).

Supplementary Figure 7.

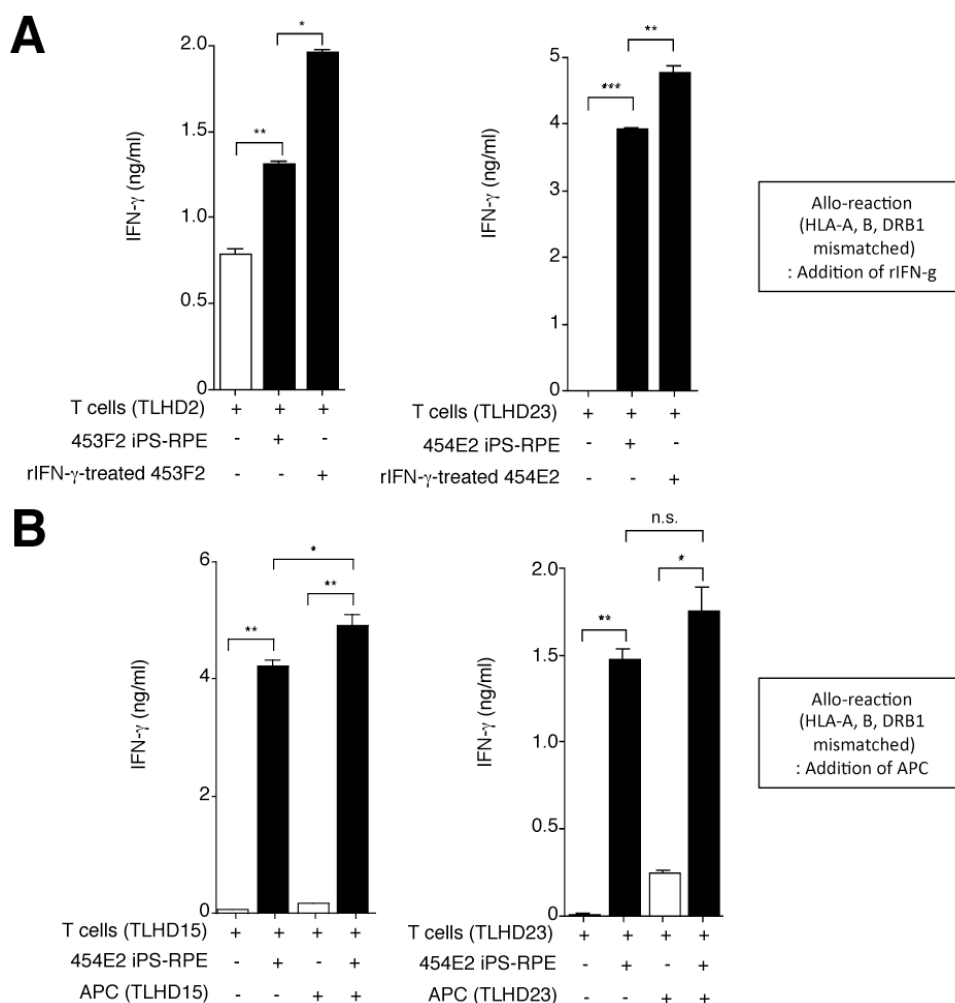

**Response to allogeneic HLA homozygous iPS-RPE cells by CD4<sup>+</sup> T cells in the presence of recombinant IFN- $\gamma$  or antigen-presenting cells (APC)** (A) Purified CD4<sup>+</sup> T cells were cultured with iPS-RPE cells or IFN- $\gamma$ -pretreated iPS-RPE cells for 48 hr, and the levels of IFN- $\gamma$  in the supernatants were measured. The graph indicates data for IFN- $\gamma$  production by CD4<sup>+</sup> T cells exposed to target iPS-RPE cells. Left panel – TLHD2 T cells vs 453F2 RPE cells (untreated) or IFN- $\gamma$ -pretreated cells. Right panel – TLHD23 T cells vs 454E2 RPE cells (untreated) or IFN- $\gamma$ -pretreated cells. (B) CD4<sup>+</sup> T cells were cultured with 454E2 iPS-RPE cells plus autogenic APC (left panel – TLHD15 T cells plus APC, right panel – TLHD23 T cells plus APC). Data represent the means  $\pm$  S.E.M of three independent experiments. \*  $P < 0.05$ , \*\*  $P < 0.005$ , \*\*\*  $P < 0.0005$ , as compared to the CD4<sup>+</sup> T cells alone (open bar). n.s. – not significant.



**Supplementary Table 1. Summary for HLA-allele type in T cells from healthy donors**

| No. | T cells | HLA-A        | HLA-B       | HLA-C       | HLA-DRB1    | HLA-DQB1    | HLA-DPB1    |
|-----|---------|--------------|-------------|-------------|-------------|-------------|-------------|
| 1   | TLHD1   | 11:01/-      | 15:01/67:01 | 04:01/07:02 | 09:01/16:02 | 03:03/05:02 | 02:02/05:01 |
| 2   | TLHD2   | 26:01/A31:01 | 39:01/51:01 | 07:02/14:02 | 09:01/15:01 | 03:03/06:02 | 02:01/05:01 |
| 3   | TLHD3   | 02:06/11:01  | 35:01/54:01 | 01:02/03:04 | 04:05/08:02 | 03:02/04:01 | 05:01/-     |
| 4   | TLHD4   | 02:01/03:01  | 15:01/51:01 | 04:01/15:02 | 04:02/04:06 | 03:02/-     | 02:01/05:01 |
| 5   | TLHD5   | 24:02/33:03  | 07:02/44:03 | 07:02/14:03 | 01:01/13:02 | 05:01/06:04 | 04:01/05:01 |
| 6   | TLHD6   | 11:01/26:02  | 39:01/52:01 | 07:02/12:02 | 08:03/15:02 | 06:01/-     | 04:02/09:01 |
| 7   | TLHD7   | 24:02/26:01  | 35:01/54:01 | 01:02/07:02 | 14:05/15:01 | 05:03/06:02 | 02:01/05:01 |
| 8   | TLHD8   | 26:01/26:03  | 13:01/35:01 | 03:03/03:04 | 12:02/15:01 | 03:01/06:02 | 02:01/05:01 |
| 9   | TLHD9   | 24:02/26:03  | 51:01/54:01 | 01:02/14:02 | 04:05/12:01 | 03:01/04:01 | 05:01/09:01 |
| 10  | TLHD10  | 24:02/31:01  | 40:02/52:01 | 03:04/12:02 | 15:01/15:02 | 06:01/06:02 | 02:01/09:01 |
| 11  | TLHD11  | 24:02/-      | 07:02/59:01 | 01:02/07:02 | 04:05/09:01 | 03:03/04:01 | 04:02/-     |
| 12  | TLHD12  | 24:02/26:01  | 51:01/54:01 | 01:02/14:02 | 14:03/14:05 | 03:01/05:03 | 05:01/-     |
| 13  | TLHD13  | 24:02/26:01  | 40:02/56:01 | 01:02/03:04 | 04:05/14:54 | 04:01/05:03 | 03:01/05:01 |
| 14  | TLHD14  | 01:01/24:02  | 37:01/51:01 | 06:02/14:02 | 09:01/10:01 | 03:03/05:01 | 04:01/09:01 |
| 15  | TLHD15  | 02:01/24:02  | 48:01/54:01 | 01:02/18:01 | 04:05/-     | 04:01/-     | 02:01/05:01 |
| 16  | TLHD16  | 02:01/31:01  | 15:01/40:02 | 03:03/15:02 | 09:01/-     | 03:03/-     | 05:01/-     |
| 17  | TLHD17  | 24:02/31:01  | 54:01/55:02 | 01:02/-     | 04:05/09:01 | 03:03/04:01 | 02:01/05:01 |
| 18  | TLHD18  | 02:01/11:01  | 15:01/52:01 | 01:02/12:02 | 14:54/15:02 | 05:02/06:01 | 02:02/09:01 |
| 19  | TLHD19  | 02:01/33:03  | 35:01/44:03 | 03:03/14:03 | 13:02/15:02 | 06:01/06:04 | 04:01/09:01 |
| 20  | TLHD20  | 02:01/24:02  | 44:03/51:01 | 14:02/14:03 | 09:01/13:02 | 03:03/06:04 | 02:01/05:01 |
| 21  | TLHD21  | 24:02/24:20  | 39:01/52:01 | 07:02/12:02 | 09:01/15:02 | 06:01/03:03 | 05:01/09:01 |
| 22  | TLHD22  | 24:02/26:02  | 39:01/40:06 | 07:02/08:01 | 08:03/14:06 | 06:01/03:01 | 02:01/03:01 |
| 23  | TLHD23  | 02:01/33:03  | 46:01/54:01 | 01:02/-     | 04:05/08:03 | 04:01/06:01 | 05:01/09:01 |
| 24  | TLHD24  | 24:02/33:03  | 40:02/44:03 | 03:04/14:03 | 08:03/14:54 | 05:03/06:01 | 02:01/-     |
| 25  | TLHD25  | 24:02/33:03  | 44:03/55:02 | 12:03/14:03 | 04:05/13:02 | 04:01/06:04 | 02:02/05:01 |
| 26  | TLHD26  | 02:01/26:03  | 40:06/44:03 | 08:01/14:03 | 04:05/08:03 | 04:01/06:01 | 04:02/05:01 |

The sample of HLA typing was all PBMC (n=26).

**Supplementary Table 2. Results for T-cell response to HLA homozygous iPS-RPE cells**

| No. | T cells | T-cell response to 454E2* | HLA-matched to 454E2 iPS-RPE                    |
|-----|---------|---------------------------|-------------------------------------------------|
| 1   | TLHD1   | (+)                       |                                                 |
| 2   | TLHD2   | (+)                       |                                                 |
| 3   | TLHD3   | (+)                       |                                                 |
| 4   | TLHD4   | (+)                       |                                                 |
| 5   | TLHD5   | (+)                       | A*24:02                                         |
| 6   | TLHD6   | (-)                       | B*52:01/C*12:02/DRB1*15:02 /DQB1*06:01          |
| 7   | TLHD7   | (+)                       | A*24:02                                         |
| 8   | TLHD8   | (+)                       |                                                 |
| 9   | TLHD9   | (+)                       | A*24:02                                         |
| 10  | TLHD10  | (-)                       | A*24:02 /B*52:01/C*12:02/DRB1*15:02 /DQB1*06:01 |
| 11  | TLHD11  | (-)                       | A*24:02                                         |
| 12  | TLHD12  | (+)                       | A*24:02                                         |
| 13  | TLHD13  | (+)                       | A*24:02                                         |
| 14  | TLHD14  | (+)                       | A*24:02                                         |
| 15  | TLHD15  | (+)                       | A*24:02                                         |
| 16  | TLHD16  | (+)                       |                                                 |
| 17  | TLHD17  | (+)                       | A*24:02                                         |
| 18  | TLHD18  | (-)                       | B*52:01/C*12:02/DRB1*15:02 /DQB1*06:01          |
| 19  | TLHD19  | (-)                       | DRB1*15:02 /DQB1*06:01                          |
| 20  | TLHD20  | (+)                       | A*24:02                                         |
| 21  | TLHD21  | (-)                       | A*24:02/B*52:01/C*12:02/DRB1*15:02/DQB1*06:01   |
| 22  | TLHD22  | (+)                       | A*24:02 /DQB1*06:01                             |
| 23  | TLHD23  | (+)                       |                                                 |
| 24  | TLHD24  | (+)                       | A*24:02                                         |
| 25  | TLHD25  | (+)                       | A*24:02                                         |
| 26  | TLHD26  | (+)                       | DQB1*06:01                                      |

\* T-cell response to 454E2 - Compared with IFN- $\gamma$  ELISA data of T cells without RPE (controls), (+) indicates high, and (-) indicates low or similar levels in the results of T cells exposed to 454E2 iPS-RPE cells.
